# Supplementary material for: Immunometabolic and potential tumor-promoting changes in 3D cervical cell models infected with bacterial vaginosis-associated bacteria
Source: PubMed Central journal article supplement (PMC9307755; doi:10.1038/s42003-022-03681-6), 2022-07-22
Supplement: 42003_2022_3681_MOESM1_ESM.pdf [file 42003_2022_3681_MOESM1_ESM.pdf]

## Supplementary Information

### Immunometabolic and oncogenic potentials of understudied cervicovaginal microbiota related to bacterial vaginosis and gynecologic cancer

Jason D. Maarsingh<sup>1</sup>, Paweł Łaniewski<sup>2</sup>, and Melissa Herbst-Kralovetz<sup>1,2,\*</sup>

<sup>1</sup>Department of Obstetrics and Gynecology, College of Medicine-Phoenix, University of Arizona,  
Phoenix, AZ, USA

<sup>2</sup>Department of Basic Medical Sciences, College of Medicine-Phoenix, University of Arizona,  
Phoenix, AZ, USA

\* Corresponding author

Email: [mherbst1@arizona.edu](mailto:mherbst1@arizona.edu) (MHK)

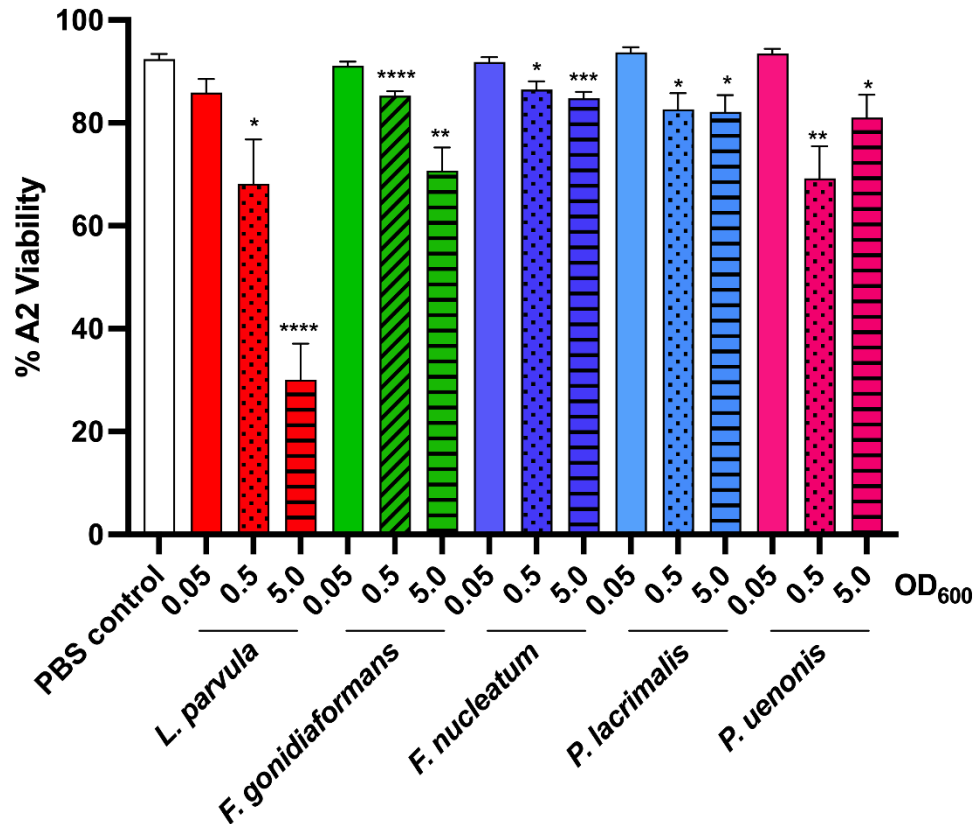

**Supplementary Figure 1. BVAB induce modest cytotoxic against cervical cell monolayers.**

Trypan blue exclusion staining demonstrating dose-dependent cytotoxicity of *L. parvula*, *F. gonidiaformans*, *F. nucleatum*, *P. lacrimalis*, and *P. uenonis* against cervical cell monolayer cultures. Cervical cells were infected with BVAB at three doses: low, medium, high corresponding to final OD<sub>600</sub> of 0.1, 0.01, and 0.001 per 1x10<sup>5</sup> cervical cells/mL, respectively. Infected cultures were incubated anaerobically at 37 °C for 24 h prior to obtaining experimental results. Error bars represent standard deviation. All experiments were performed as three independent experiments. \*,  $p < 0.05$ ; \*\*,  $p < 0.01$ ; \*\*\*,  $p < 0.001$ . One-way ANOVA with Dunnett's multiple comparisons against mock-infected controls.

### a Cytokines

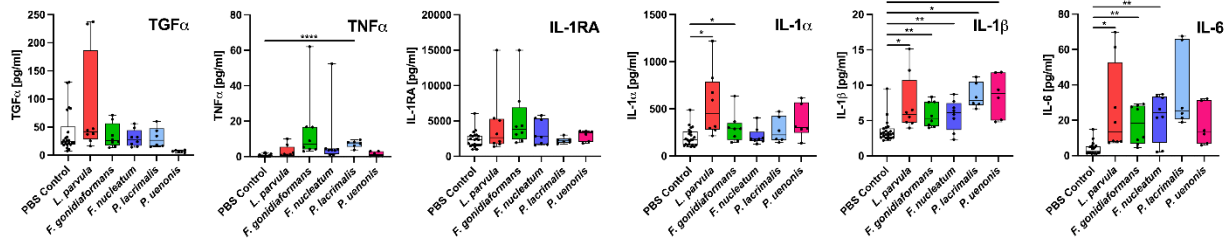

### b Chemokines

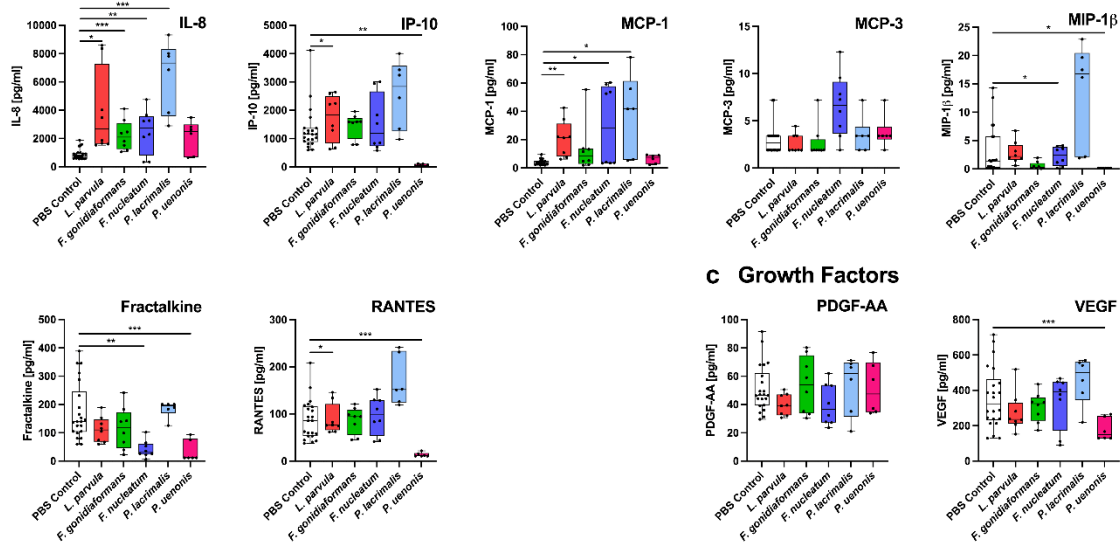

### c Growth Factors

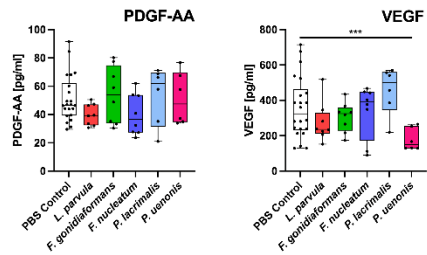

**Supplementary Figure 2. BVAB associated with gynecological cancer induce pro-inflammatory cytokine and chemokine responses in 3-D cervical cells.**

Bio-Plex analysis of cytokines (A), chemokines (B), and growth factors (C) secreted by 3-D cervical cells infected with BVAB for 24 h. \*,  $p < 0.05$ ; \*\*,  $p < 0.01$ ; \*\*\*,  $p < 0.001$ ; \*\*\*\*,  $p < 0.0001$ .

Two-tailed unpaired Student's t-test (infection vs. mock-infected controls). Error bars represent standard deviation.

# Circulating cancer biomarkers

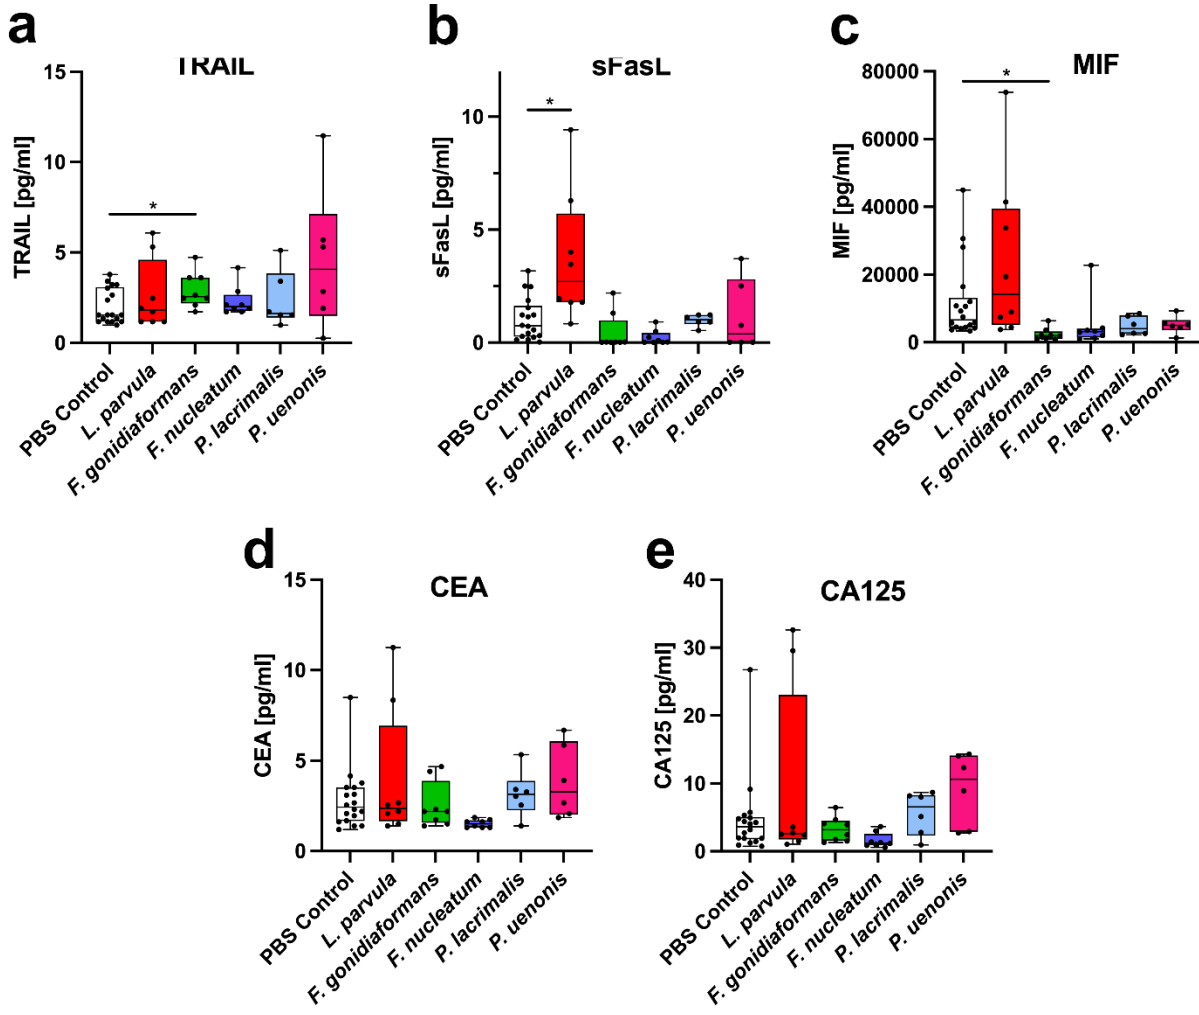

Supplementary Figure 3. *A. parvulum* and *F. gonidiaformans* induce cancer biomarker signatures during 3-D cervical cell infection.

Bio-Plex analysis of circulating cancer biomarkers induced by BVAB for 24 h. \*,  $p < 0.05$ .

Unpaired two-tailed Student's t-test (infection vs. mock infected controls). Error bars represent standard deviation.

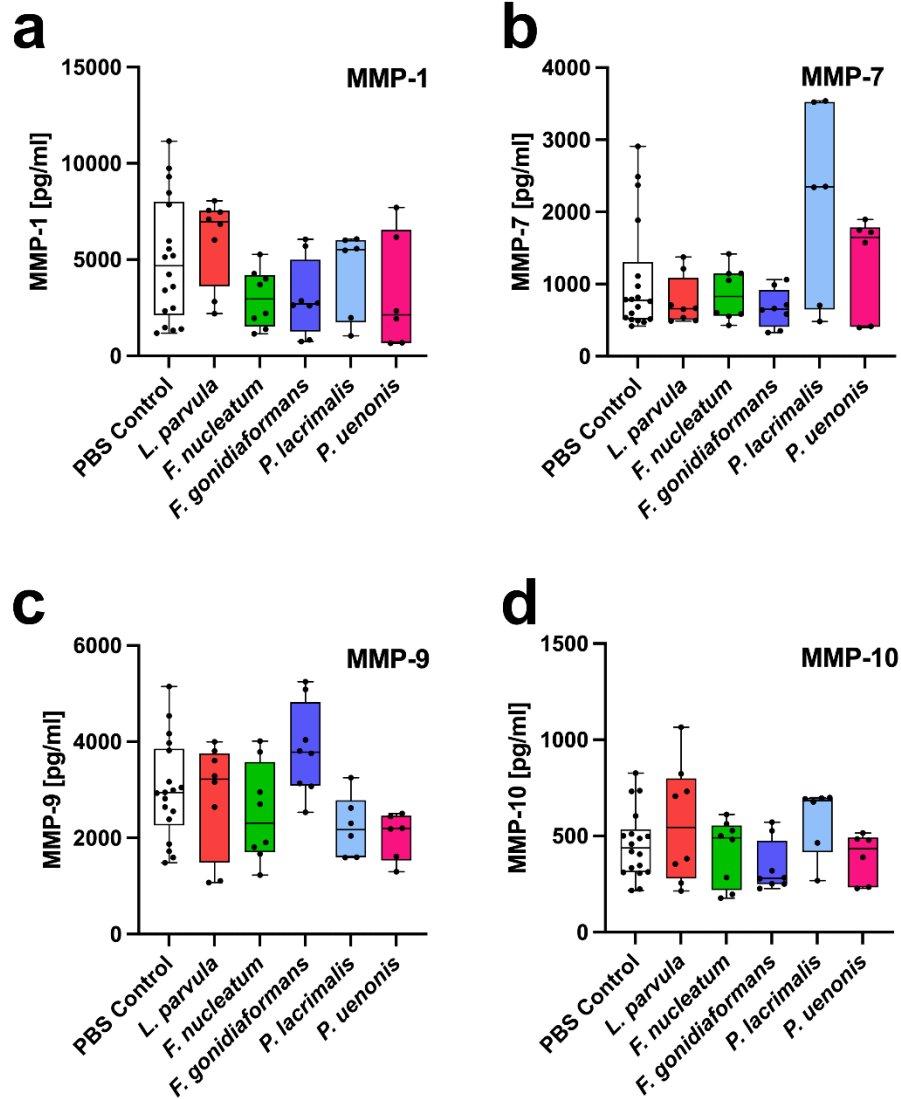

**Supplementary Figure 4. BVAB associated with gynecological cancer do not modulate matrix metalloproteinase responses in 3-D cervical cells.**

Bio-Plex analysis of matrix metalloproteinases (MMPs) induced by BVAB for 24 h. Unpaired two-tailed Student's t-test (infection vs. mock infected controls). Error bars represent standard deviation.

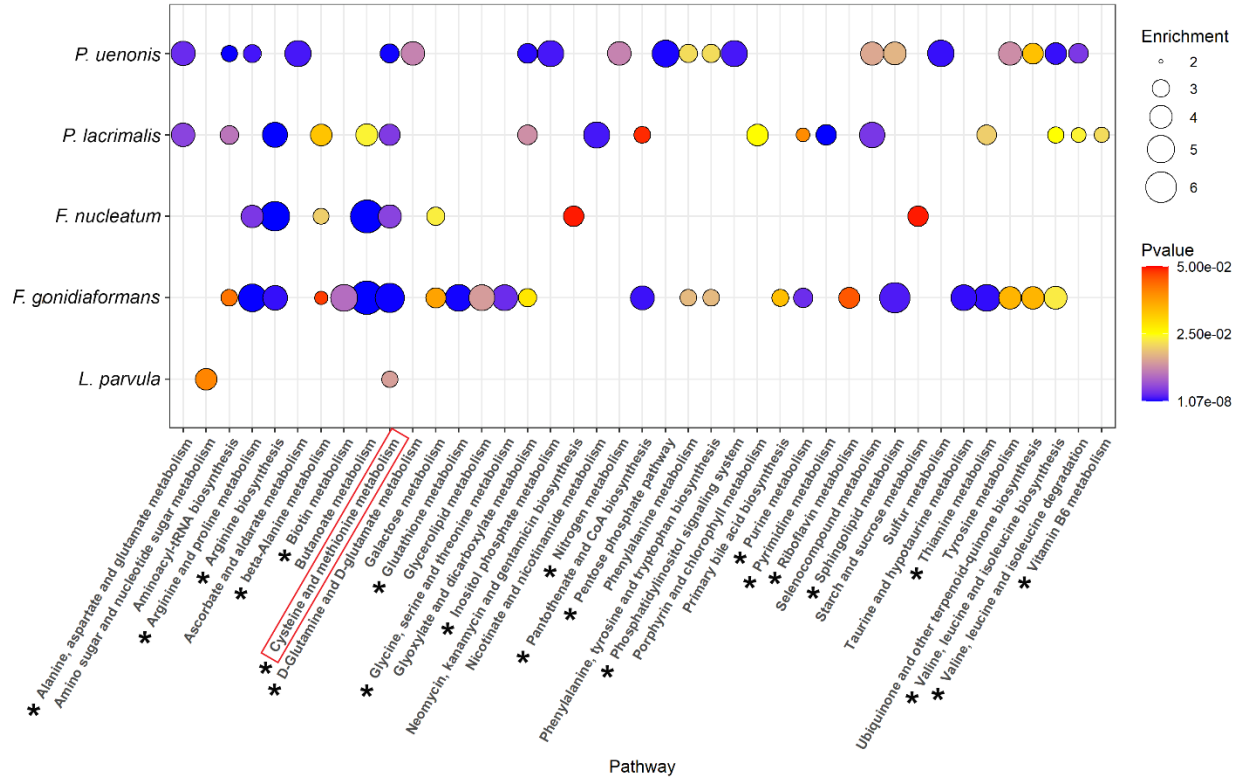

**Supplementary Figure 5. BVAB modulate enrichment of metabolic pathways corresponding to amino acid and lipid metabolism.**

Bubble plots of significantly enriched KEGG metabolic pathways based on comparisons of metabolomic profiles of infection vs. mock-infected controls. Bubble plot size is proportional to the enrichment value. Bubbles are colored based on significance ( $p$ -value) of enriched metabolic pathways. Asterisks denote metabolic pathways known to be associated with cancer. The cysteine and methionine metabolic pathway (denoted within the red box) was significantly ( $p < 0.05$ ) enriched by all BVAB tested in this study.
