# Supplementary material for: Immunometabolic and potential tumor-promoting changes in 3D cervical cell models infected with bacterial vaginosis-associated bacteria
Source: PubMed Central journal article supplement (PMC9307755; doi:10.1038/s42003-022-03681-6), 2022-07-22
Supplement: 42003_2022_3681_MOESM2_ESM.pdf [file 42003_2022_3681_MOESM2_ESM.pdf]

## Description of Additional Supplementary Files

**File name:** Supplementary Data 1

**Description:** Metabolite and pathway list including fold-change (infection vs. PBS control) and statistical ( $p$  &  $q$ ) values.

**File name:** Supplementary Data 2

**Description:** Source Data
